# Supplementary material
Source: PubMed Central journal article supplement (PMC3840068)
Supplement: NIHMS517900-supplement-01.pdf [file NIHMS517900-supplement-01.pdf]

## SUPPLEMENTAL MATERIAL AND METHODS

### Measurement of lipid/lipoprotein (LDL, HDL, and VLDL) particle size and their concentrations

**Small dense LDL-C and %sdLDL:** Small dense LDL cholesterol (sdLDL-C) in serum was measured by the homogenous quantitative assay kit (Denka Seiken, Japan) (1). Percent small-dense LDL was subsequently calculated from sdLDL-C and LDL-cholesterol

### **VLDL, LDL, and HDL size and particles numbers by nuclear magnetic resonance (NMR):**

VLDL, LDL and HDL particle number and size were measured by proton NMR spectroscopy at Liposcience (Raleigh, NC) as described previously (2-4). Briefly, the NMR method uses the characteristic signals (methylene and methyl shift) originated from lipoprotein subclasses of different size as the basis of their quantification. Each subclass signal represents the number of terminal methyl groups on the lipids contained within the particle. Cholesterol esters and triglycerides in the particle core each contribute 3 methyl groups, and phospholipids and unesterified cholesterol in the surface shell each contribute 2 methyl groups. The methyl NMR signal emitted by each subclass serves as a direct measure of the concentration of that subclass.

### **HDL2 Cholesterol**

HDL2-C is calculated indirectly by subtracting high density lipoprotein 3-cholesterol (HDL3-C) from total high density lipoprotein cholesterol (HDL-C). Precipitation of apoB-containing lipoproteins and HDL2 was performed as previously described (5). Briefly, 20  $\mu$ L of HDL3 reagent containing 19.1 mg/mL of 50 kDa molecular weight dextran sulfate (Cat#00501, Warnick reagent, Spanish Fork, UT 84660 USA) and 1.95 mol/L of MgCl<sub>2</sub> (Cat. #BDH0244, VWR, USA) was added to 200  $\mu$ L of serum. After a quick vortex, the sample was incubated at room temperature for 10 min, followed by centrifugation at 1000 x g for 15 min. The clear supernatant was then assayed for total cholesterol using a Roche Modular P automated chemistry analyzer.

### **Apolipoprotein B:**

ApoB was measured on Roche P modular system according to the kit catalogue No 03032639 122 and associated package insert No 03252728001v12.

### **Apolipoprotein A-I:**

ApoA-I was measured on Roche P modular system according to the kit catalogue No 03032612 122 and associated package insert No 03252701001v10.

### **HDL-C**

HDL-C was measured on Roche P modular system according to the Randox kit catalogue No CH 2655 and associated package insert.

### **LDL-C**

LDL-C was measured on Roche P modular system according to the Randox kit catalogue No CH 2656 and associated package insert.

### **ALT:**

ALT was measured on Roche P modular system according to the kit catalogue number 11876805 216 and associated package insert No 11965328001V13.

|                              | Age Group 1<br>(18-39 years) | Age Group 2<br>(40-59) | Age Group 3<br>(60+ years) | P for trend |
|------------------------------|------------------------------|------------------------|----------------------------|-------------|
| <b>DEMOGRAPHICS</b>          |                              |                        |                            |             |
| N                            | 650                          | 2854                   | 3019                       | --          |
| Age (years)                  | 33±5                         | 51±5                   | 70±7                       | --          |
| Gender (%male)               | 54                           | 55                     | 49                         | --          |
| BMI (kg/m <sup>2</sup> )     | 29.7±6.7                     | 30.2±5.9               | 29.1±5.4                   | <.0001      |
| ALT (IU/L)                   | 28±18                        | 28±15                  | 23±12                      | <.0001      |
| AST (IU/L)                   | 26±22                        | 26±12                  | 25±10                      | .0004       |
| <b>TRADITIONAL FACTORS</b>   |                              |                        |                            |             |
| HDL-C (mg/dL)                | 50±12                        | 51±14                  | 52±15                      | .003        |
| LDL-C (mg/dL)                | 104±31                       | 102±32                 | 89±32                      | <.0001      |
| Triglycerides (mg/dL)        | 148±149                      | 144±155                | 127±73                     | <.0001      |
| Total cholesterol (mg/dL)    | 187±43                       | 187±43                 | 173±44                     | <.0001      |
| <b>INSULIN RESISTANCE</b>    |                              |                        |                            |             |
| Hemoglobin A1c (%)           | 5.5±1.1                      | 5.9±1.2                | 6.0±1.0                    | <.0001      |
| Free Fatty Acids (mmol/L)    | 0.62±0.30                    | 0.65±0.27              | 0.67±0.26                  | <.0001      |
| Glucose (mg/dL)              | 98±33                        | 106±38                 | 110±33                     | <.0001      |
| Insulin (uU/mL)              | 16.4±23.7                    | 15.1±19.0              | 14.1±14.9                  | .006        |
| <b>VLDL</b>                  |                              |                        |                            |             |
| Apolipoprotein-B (mg/dL)     | 91±25                        | 92±26                  | 83±25                      | <.0001      |
| VLDL-P (nmol/L)              | 4.9±10.2                     | 4.1±8.2                | 2.8±4                      | <.0001      |
| VLDL size (nm)               | 47.6±7.1                     | 47.5±6.5               | 46.8±5.6                   | .0002       |
| <b>LDL</b>                   |                              |                        |                            |             |
| LDL-P (mg/dL)                | 1552±568                     | 1594±559               | 1432±526                   | <.0001      |
| %sdLDL-C                     | 26.6±9.7                     | 28.0±11.2              | 27.2±8.1                   | .0003       |
| sdLDL-C (mg/dL)              | 27.8±13.5                    | 28.5±13.7              | 24.2±11.4                  | <.0001      |
| sdLDL-P (nmol/L)             | 812±509                      | 836±502                | 747±430                    | <.0001      |
| <b>HDL</b>                   |                              |                        |                            |             |
| Apolipoprotein-A1 (mg/dL)    | 142±28                       | 148±29                 | 151±31                     | <.0001      |
| HDL2-C (mg/dL)               | 11.8±5.7                     | 11.8±5.9               | 12.8±6.2                   | <.0001      |
| <b>MISCELLANEOUS</b>         |                              |                        |                            |             |
| Lp(a) (mg/dL)                | 36.6±42.8                    | 37.7±44.1              | 40.2±46.8                  | .053        |
| ApoB:ApoA1 ratio             | 0.67±0.23                    | 0.65±0.26              | 0.57±0.21                  | <.0001      |
| NAFLD liver fat score        | -0.403±3.774                 | -0.614±2.62            | -0.91±2.351                | <.0001      |
| <b>INFLAMMATORY</b>          |                              |                        |                            |             |
| Fibrinogen (mg/dL)           | 390±90                       | 411±93                 | 444±100                    | <.0001      |
| hs-C-reactive protein (mg/L) | 3.36±5.16                    | 3.45±5.83              | 3.72±7.86                  | .23         |
| Lp-PLA2 (ng/mL)              | 136±44                       | 134±43                 | 136±45                     | .19         |
| Myeloperoxidase (pmol/L)     | 464±163                      | 452±148                | 478±180                    | <.0001      |
| <b>METABOLIC</b>             |                              |                        |                            |             |
| Homocysteine (umol/L)        | 10.3±4.3                     | 11.7±4.9               | 13.5±5.2                   | <.0001      |
| Folate                       | 11.5±4.4                     | 11.5±4.4               | 13.3±5                     | <.0001      |
| TSH (uIU/mL)                 | 2.21±4.01                    | 2.28±4.53              | 2.46±3.98                  | .36         |
| Vitamin D (ng/mL)            | 30.7±14.2                    | 33.5±14.1              | 35±14.6                    | <.0001      |

**Supplemental Table 1:** Impact of age on serum atherogenic profile. Atherogenic profile was better in individuals 60 years or older compared to the younger cohorts. All data presented as mean ± S.D.

|                              | ALT<br>Q1  | ALT<br>Q2  | ALT<br>Q3  | ALT<br>Q4 | P for<br>trend |
|------------------------------|------------|------------|------------|-----------|----------------|
| <b>DEMOGRAPHICS</b>          |            |            |            |           |                |
| N                            | 1342       | 1794       | 1638       | 1724      |                |
| Age (years)                  | 60±16      | 60±13      | 58±12      | 54±12     | <.0001         |
| Gender (%male)               | 28         | 43         | 62         | 70        | <.0001         |
| BMI (kg/m <sup>2</sup> )     | 28.4±6.3   | 29.2±5.8   | 29.8±5.4   | 30.8±5.5  | <.0001         |
| ALT (IU/L)                   | 12±2       | 18±2       | 25±2       | 43±14     | ----           |
| AST (IU/L)                   | 18±4       | 21±4       | 25±5       | 33±13     | <.0001         |
| <b>TRADITIONAL FACTORS</b>   |            |            |            |           |                |
| HDL-C (mg/dL)                | 54±15      | 54±14      | 51±14      | 48±13     | <.0001         |
| LDL-C (mg/dL)                | 96±32      | 96±32      | 95±33      | 98±34     | .08            |
| Triglycerides (mg/dL)        | 118±96     | 122±86     | 142±149    | 158±131   | <.0001         |
| Total cholesterol (mg/dL)    | 181±42     | 181±42     | 179±45     | 181±45    | .30            |
| <b>INSULIN RESISTANCE</b>    |            |            |            |           |                |
| Hemoglobin A1c (%)           | 5.8±1.1    | 5.8±1.0    | 6.0±1.2    | 6.0±1.1   | .007           |
| Free Fatty Acids (mmol/L)    | 0.62±0.26  | 0.65±0.26  | 0.65±0.26  | 0.69±0.27 | <.0001         |
| Glucose (mg/dL)              | 104±35     | 104±30     | 108±38     | 110±37    | <.0001         |
| Insulin (uU/mL)              | 11.7±13.7  | 13±14.8    | 14.8±14    | 18.7±21.4 | <.0001         |
| <b>VLDL</b>                  |            |            |            |           |                |
| Apolipoprotein-B (mg/dL)     | 86±25      | 86±24      | 88±26      | 91±27     | <.0001         |
| VLDL-P (nmol/L)              | 2.3±4.3    | 2.7±5.5    | 3.7±6.2    | 5.0±9.1   | <.0001         |
| VLDL size (nm)               | 45.4±5.6   | 46.1±5.7   | 47.8±6     | 48.8±6.5  | <.0001         |
| <b>LDL</b>                   |            |            |            |           |                |
| LDL-P (mg/dL)                | 1446±529   | 1472±523   | 1519±550   | 1602±577  | <.0001         |
| %sdLDL-C                     | 24.7±7.1   | 25.7±7.5   | 28.7±11.9  | 30.5±9.9  | <.0001         |
| sdLDL-C (mg/dL)              | 23.7±10.6  | 24.6±11    | 27.2±13.4  | 29.7±14.5 | <.0001         |
| sdLDL-P (nmol/L)             | 684±436    | 721±430    | 826±470    | 911±503   | <.0001         |
| <b>HDL</b>                   |            |            |            |           |                |
| Apolipoprotein-A1 (mg/dL)    | 152±32     | 152±30     | 148±29     | 144±29    | <.0001         |
| HDL2-C (mg/dL)               | 13.6±6.2   | 12.9±6.1   | 11.5±5.7   | 11.2±5.9  | <.0001         |
| <b>MISCELLANEOUS</b>         |            |            |            |           |                |
| Lp(a) (mg/dL)                | 43.5±46.8  | 41.3±47.8  | 38.2±44.6  | 33.2±41.3 | <.0001         |
| ApoB:ApoA1 ratio             | 0.59±0.22  | 0.59±0.20  | 0.61±0.26  | 0.67±0.25 | <.0001         |
| NAFLD liver fat score        | -1.85±2.16 | -1.16±2.25 | -0.62±2.10 | 0.50±3.25 | <.0001         |
| <b>INFLAMMATORY</b>          |            |            |            |           |                |
| Fibrinogen (mg/dL)           | 443±105    | 432±101    | 418±95     | 407±89    | <.0001         |
| hs-C-reactive protein (mg/L) | 4.3±7.5    | 3.5±6.7    | 3.3±6.2    | 3.1±5.2   | <.0001         |
| Lp-PLA2 (ng/mL)              | 138±45     | 135±44     | 132±42     | 134±44    | .0089          |
| Myeloperoxidase (pmol/L)     | 479±170    | 465±180    | 452±153    | 468±156   | .0014          |
| <b>METABOLIC</b>             |            |            |            |           |                |
| Homocysteine (umol/L)        | 12.9±5.8   | 12.3±5.4   | 12.2±5     | 12.1±4.2  | <.0001         |
| Folate                       | 11.3±4.2   | 12.9±4.9   | 13.0±5.2   | 13.2±4.9  | <.0001         |
| TSH (uIU/mL)                 | 2.7±6.2    | 2.2±3.1    | 2.3±5.1    | 2.2±1.5   | .072           |
| Vitamin D (ng/mL)            | 31.8±14.1  | 35±14.5    | 34.6±14.3  | 33.6±14.4 | <.0001         |

**Supplemental Table 2:** Atherogenic variables by quartiles of ALT in 6,498 subjects with no known chronic medical problems. All data presented as mean ± S.D.
